# Supplementary material for: The challenge of multiple cardiovascular risk factor control outside Western Europe: Findings from the International ChoLesterol management Practice Study
Source: PubMed Central journal article supplement — Eur J Prev Cardiol. 2019 Sep 19;27(13):1403–11. doi: 10.1177/2047487319871735 (PMC7457454; doi:10.1177/2047487319871735), 2019-09-19
Supplement: Supplemental_Material.pdf [file Supplemental_Material.pdf]

## Supplementary Appendix

**Supplementary Table 1. 2012 European guideline cardiovascular risk factor targets.<sup>1</sup>**

| <b>Risk factor</b>              | <b>Recommended target</b>                 |
|---------------------------------|-------------------------------------------|
| HbA1c                           | <7%                                       |
| Systolic blood pressure         | <140 mmHg                                 |
| Diastolic blood pressure        | <90 mmHg                                  |
| LDL-C                           |                                           |
| Low- and moderate-risk patients | <3.0 mmol/L (~115 mg/dL)                  |
| High risk patients              | <2.5 mmol/L (~100 mg/dL) or 50% reduction |
| Very high-risk patients         | <1.8 mmol/L (~70 mg/dL) or 50% reduction  |

HbA1c, glycated haemoglobin; LDL-C, low-density lipoprotein cholesterol.

**Supplementary Table 2. List of International ChoLesterol management Practice Study (ICLPS) investigators and patient enrolment numbers.**

| <b>Region</b>                             | <b>Country</b> | <b>Patients enrolled, <i>n</i></b> | <b>Principal Investigator/National Coordinator</b>                                                                                                                                                                                                                       |
|-------------------------------------------|----------------|------------------------------------|--------------------------------------------------------------------------------------------------------------------------------------------------------------------------------------------------------------------------------------------------------------------------|
| Eastern Europe<br>( <i>n</i> = 846, 9.3%) | Russia         | 349                                | Yuri Karpov (Principal Investigator and National Coordinator), Russian Cardiology Research & Development Complex, Moscow, Russia                                                                                                                                         |
|                                           | Ukraine        | 497                                | Olena Mitchenko (National Coordinator), National Scientific Center: "M.D. Strazhesko Institute of Cardiology" Academy of Medical Sciences of Ukraine, Narodnogo Opolcheniya Kyiv, Ukraine                                                                                |
| Asia<br>( <i>n</i> = 3546, 39.2%)         | Bangladesh     | 499                                | Abdul Wadud Chowdhury (Principal Investigator and National Coordinator), Dhaka Medical College Hospital, Dhaka, Bangladesh                                                                                                                                               |
|                                           | India          | 2013                               | Kaul Upendra (Principal Investigator and National Coordinator), Fortis Escorts Heart Institute & Research Centre, Fortis Hospitals, New Delhi, India                                                                                                                     |
|                                           | South Korea    | 1034                               | Kim Sung Rae (National Coordinator), Bucheon St. Mary's Hospital, Wonmi-gu, Bucheon-si, Gyeonggi-do, Republic of Korea.<br><br>Choi Sung-Hee (National Coordinator), Seoul National University Bundang Hospital, Bundang-gu, Seongnam-si, Gyeonggi-do, Republic of Korea |
| Africa<br>( <i>n</i> = 881, 9.7%)         | Algeria        | 485                                | Abdelkrim Berrah (National Coordinator), Service de Médecine Interne, Centre Hospitalo-Universitaire, Mohamed Lamine Debaghine Bab El Oued, 16000 Algiers, Algeria                                                                                                       |
|                                           | South Africa   | 396                                | Dirk Blom (Principal Investigator and National Coordinator), Lipid Laboratory, University of Cape Town, Cape Town, South Africa                                                                                                                                          |
| Middle East<br>( <i>n</i> = 1890, 20.9%)  | Israel         | 99                                 | Yossi Azuri (Principal Investigator and National Coordinator), Maccabi Health Care Services, Tel Aviv, Israel                                                                                                                                                            |
|                                           | Kuwait         | 150                                | Mohammed Zubaid (Principal Investigator and National Coordinator), Mubarak Hospital, Jabriya, Kuwait                                                                                                                                                                     |
|                                           | Oman           | 97                                 | Khalid Al Rasahdi (Principal Investigator and National Coordinator), Sultan Qaboos University, Muscat, Oman                                                                                                                                                              |
|                                           | Lebanon        | 200                                | Rabih Azar (Principal Investigator and National Coordinator), Hotel Dieu De France Hospital, Rue al Syrian, Ashrafieh, Beirut, Lebanon                                                                                                                                   |

|                                            |                      |      |                                                                                                                                                                                       |
|--------------------------------------------|----------------------|------|---------------------------------------------------------------------------------------------------------------------------------------------------------------------------------------|
|                                            | Saudi Arabia         | 231  | Mohammed Balgaith (Principal Investigator and National Coordinator), Cardiology Center, National Guard Hospital, Riyadh, Saudi Arabia                                                 |
|                                            | Turkey               | 830  | Meral Kayıkçioğlu (Principal Investigator and National Coordinator), Ege University Faculty of Medicine Department of Cardiology, Bornova, İzmir, Turkey                              |
|                                            | United Arab Emirates | 283  | Wael Mahameed (National Coordinator), Sheikh Khalifa Medical City, Abu Dhabi, United Arab Emirates                                                                                    |
| Latin America<br>( <i>n</i> = 1886, 20.8%) | Argentina            | 307  | Carlos Alberto Cuneo (Principal Investigator and National Coordinator), Prevencion Cardiovascular Salta, Provincia de Salta, Argentina                                                |
|                                            | Brazil               | 499  | Raul Santos (Principal Investigator and National Coordinator), Instituto Do Coração Do Hospital Das Clínicas Da Faculdade De Medicina Da Universidade De São Paulo, São Paulo, Brazil |
|                                            | Colombia             | 454  | Alvaro J. Ruiz (National Coordinator), San Ignacio Hospital, Pontificia Universidad Javeriana, Bogotá, Colombia                                                                       |
|                                            | Mexico               | 626  | Carlos A. Aguilar Salinas (Principal Investigator), Instituto Nacional de Ciencias Medicas y Nutricion, Mexico City, Mexico                                                           |
| Total population                           |                      | 9049 |                                                                                                                                                                                       |

---

ICLPS, International ChoLesterol management Practice Study.

### Investigators who enrolled at least one patient

**Algeria:** Hadjissa Khadidja, Zebbar Nacerddine, Gouader Moussa, Senouci Fatima, Benissad Houria, Tazdait Rafik, Hamidouche Karima, Ayache Ahmed, Achaibou Rachid, Dahmane Saida, Benkhodja Mohamed Bachir, Louaifi Ali, Remili Rachid, Benbouabdellah Belkacem, Hadjkali Abdelhamid, Manseur Fahima, Bertal Sabra Amina, Methia Nadira, Kadour Fatima, Latreche Samia, Agrane Khadidja, Menzou Farouk, Kichou Brahim, Djellaoudji Azzouz, Khelil Saida, Ghemri Sofiane, Nibouche Djamel Eddine, Djeghri Nora, Belguedj Rinda, AbdelBaki Mourad, Kachenoura Aldjiiia, Krim Messaad, Belkadi Zahoua, Henine Nora, Aoudia Yazid, Aouiche Samir, Yakhou Mohamed, Belhadj Fatima, Merdjana Karima, Ziani Samia, Benatmane Houria, Zellat Khiera, Faraoun Khadra, Douar Malika, Djafri Yasmina, Bouamrane Nadia, Cherief Fadila, Khellaf Hadda, Zidani Hocine, Baghous Housseem.

**Argentina:** Carlos Alberto Cuneo, Gabriel Dario Waisman, Jorge Roberto Aiub, Alejandro Hershson, Carol Kotliar, Julio Andres Vallejos, Juan Carlos Medrano, Alberto Juan Lorenzatti, Alfredo Lozada, Pablo Corral.

**Bangladesh:** Chowdhury Abdul Wadud, Haque Azizul, Chakraborti Rajashish, Hussain Md. Tofazzal, Reza Salim, Uddin Mir Jamal, Amin Mohammad Gaffar, Islam Abul Hasan Md. Waliul, Rahman Md. Toufiqur, Akter Mohammed Shamim, Khan Kaiser Nasrullah, Hossain Tanjina, Prasad Indrajit, Amin Ahsanul Haque, Ishaque S M, Habib Maruf Bin, Ali Hassan Kazi, Rabbani Raihan, Bhowmik Nirmalendu Bikash, Hassan Mohammad Nabiul.

**Brazil:** Dias Raul, Izar Maria Cristina, Saporito Wladimir, Cesena Fernando, Saraiva Jose, Maia Lilia, Ardito Wilma, Ayoub Jose, Manenti Euler, Fontana Hugo, Moraes João, Hissa Miguel, Pedrosa Hermelinda, Antunes Daniela, Lisboa Hugo, Oigman Willie, Silva Antonio, Lima Sonia, Isaia Carlos, Giraldez Viviane, Rossi Fabio.

**Colombia:** Puerta Carlos Felipe, Rincon Nelson Andres, Quintero Stella, Fandiño Alberto, Abaunza Leonidas, Jacome Andres Mauricio, Lenis Claudia Patricia, Lossa Claudia, Holguin Diego, Orozco Liliana, García Olga Lucia, Balaguera Jose Francisco, Cohen Luz Helena, Sotomayor Aristides, Jaramillo Carlos Francisco, Murillo Nelson, Lievano Manuel, Vesga Boris, Quintero Adalberto, Pantoja Dolly, Chacon Maria del Pilar, Lujan Dilcia Maria, Yepes Carlos Augusto, Lopez Claudia Tatiana, Yupanqui Hernan, Botero José Fernando, Yepes Emerson, Ibarra Jaime, Rueda Javier Enrique, Florez Jose Luis, Molina Dora, Coronel Julian.

**India:** Kaul Upendra, Krishnamurthy Deepak, Chandra Subash, Reddy Y Vijaya Chandra, Chopda Manoj, Sinha Sudhir Chandra, Kesavamurthy C B, Khan Idris Ahmed, Dave Tarun, Kawthekar Girish, Chopra Vijay Kumar, Kothari Dipesh, Kumar Ravi, Singh Kiran Pal, Ballani Piya, Modi K D, Sanyal Debmalaya, Prabhu Mukhyaprana, Nagendar Jakka, Sharma Surender Kumar, Patnala Sreedevi, Shah Jayesh, Shah Siddharth, Roy Amitabha, Jain Gaurav, Sanghvi M D, Mutha Abhay, Dani Praveen, Madhavan R, Gupta JB, Bhattacharyya Paramartha, Somani Vinod, Rohatgi Gyanendra Mohan, Sanghvi Snehal, Vasudevan Sujit, Verma Sachin, Ganga Kiran, Gupta Rajeev, Verma Sanjay, Gangakhed Satish Kumar, Beswal Gaurav, J Ramdas, Mallikarjuna Rao KV, Vadavi Arun,

Marya Rajesh, Mathew Joy, Rau Ram Mohan, Manu Sharma, Sonawane Sandeep, Ravindra Sethiya, Gandhi Sanjay, Mathew S, Kalanitthi A, Shah Ashok, Mahajan Sanjay, Pathak HS, Julka Sandeep, Gupta Sanjay, Nagre Santosh, Dhand Sunil, Bannerjee Abhijeet, T Madana Mohan, Haldar Susovan, George Abraham P, Agarwal Sanjay, Gheewala Nalin, Jain Pradeep Kumar, Tewari Ajoy K, Baldawa Vishnu, Kumar JS, Khanna Monica, Mathai Johnson, Rao Sanjay, Poddar Mahesh, Mane Rajendra, Sethia Ashok, Rao Visweswar, Perumal Nalla, Kumar J.Aman, Kongara Srikanth, Hari K, Tongaonkar Aniruddha, Gupta Sanjeev, Marda Mahesh, Jain Sunil, Sethi Kamal Kumar, Razzak MA, Rao Dayasagar, Dhar Pramod Kumar, Shah Devang.

**Israel:** Orlovsky Sophia, Chornia Larisa, Ciuraru George, Feldman Arie, Doctor Ruth, Eliyahu Vered, Radzinski Irena, Pomeranz Avishalom, Goltzman Boris, Geva Adi.

**Republic of Korea:** Sung-Il Sohn, Sung-Hee Choi, Yong-Jin Kim, Seung-Jin Oh, Jin-Ho Shin, Bo-Hyun Kim, Woo-Keun Seo, Jae-Kwan Cha, Kyoung-Im Cho, Hye-Soon Kim, Jin-Won Kim, Sang-Chol Lee, Shin-Jae Kim, Sang-Yong Kim, Jung-Rae Cho, Jung-Sun Kim, Kyung-Mook Choi, Soon-Hee Lee, Kang-Wook Lee.

**Kuwait:** Zubaid Mohammed, Farrag Ebrahim, Saad Hisham, Abd Al Monem Amro, Hasan Ebrahim, Mekhaeil Medhat, Lashin Ebrahim.

**Lebanon:** Mouawad Walid, Keshishian Sahak, Amm Mireille, Andari Emile, Zind Romel, Ballout Hajar, Mohamad Malek, Moukheiber Sami, Abdel Massih Tony, Azar Rabih.

**Mexico:** César Gonzalo Calvo Vargas, Edmundo Bayram Iltamas, Esperanza Martinez Abundis, Gerardo Andres Baez Vargas, Pedro Mendoza Martinez, Rodrigo Navarrete Valencia, Bernardo Emilio Valenzuela Salazar, Francisco Javier Robledo Gutierrez, Alfredo Nacoud Askar, Carlos Alberto Aguilar Salinas, Sergio Zuñiga Guajardo, Maria Elena Cedano Limon, Roberto Bejarano Rodriguez, Lirio de Maria Delgado Garcia, Juan Carlos Villanueva Arias, Lucia Alejandra Castillo Vigna, José Gerardo Gonzalez Gonzalez, Martha Leticia López Velazco.

**Oman:** Khalid Al Rasahdi, Khalid Al Wali, Mustafa Al Hinai, Ali Mamari, Omayma Elshafaie, Mehar Ali.

**Russia:** Karpov Yuri, Ezhov Marat, Khaisheva Larisa, Lyamina Nadezhda, Viktorova Inna, Kosmacheva Elena, Khasanov Niyaz, Libis Roman, Tretyakova Tatyana, Koziolova Natalya, Eliseeva Liudmila, Napalkov Dmitriy, Karetnikova Victoriya, Boytsov Sergey.

**Saudi Arabia:** Shukri Al Sail, Osama El Khateeb, Maryam Al Qaseer, Rashid Al Jawair, Eman Ashgar, Abdulwahab Bawahab, Hassan El Sayed, Mohammed Balgith.

**South Africa:** Blom Dirk, Amod Aslam, Chelin Neville, Coetzee Kathleen, Corbett Clive, Fouche Leon, Fourie Nyda, Govind Uttam, Joshi Shaifali, Kapp Cornelia, Kotze Hester, Makan Hemant, Mahomed Akbar, Ngcakani Nomangesi Judith, Padayachee Trevenesan, Raal Frederick, Seedat Saadiya, Snyman Hans, Trokis Julien.

**United Arab Emirates:** Azan Binbrek, Ali Aslani, Yasser El Henawy, Arshad Rasheed, Mouna Mohamdoua Boukhanera, Guevarra Daffodills, Kais Ismail Mrabet, Fahad Baslaib, Vani Krishna, Jaison T M, Nooshin Bazargani, Hashemi Pour, Katherine Rose, Lalit Maheshwari.

**Turkey:** Kayıkçıođlu Meral, Akbulut Mehmet, Arık Osman Ziya, Ural Dilek, Yılmaz Remzi, Öner Abdülvedat, Karahan Burhan, Örem Cihan, Temizhan Ahmet, Erdoğan İsmail, Kemalođlu Melek Didem, Kıрма Cevat, Altunkeser Bülent Behlül, Gökçe Mustafa, Şabanođlu Cengiz, Aksoy Mehmet, Şahin Mahmut, Taştan Ahmet, Keser Ahmet, Köseođlu Cemal, Tunçer Eşref, Demir Erdem, Yüksel Gülhan, Altın Cihan, Kanadaşı Mehmet, Aksakal Aytekin, Oğuz Aytekin, Arkan Tuğba, Bilgi Mustafa, Kamberođlu Seyfi, Gülsün Mehmet Sıdık, Çakır Murat, Şahin Nedim, Sakar Mehmet, Akyer Erdal, Karaca Elyesa, Eralp Ahmet Bülent, Bozkuş Rifat, Develiođlu Hülya, Ocak Serin Sibel, Özer Necla, Şeker Taner, Koç Mevlüt, Sağ Saim, Çabuk Ali Kemal, Üstün Emel, Şirin Yusuf, Uçar Ender, Ergene Asım Oktay, Dursun Hüseyin, Aliođlu Emin, Kilci Hakan, Ertem Ahmet Göktuğ, Aytekin Saide, Yeter Ekrem, Şahin Alparslan, Bayram Fahri, Özentürk Cihan, Dal Kürşat, Çiçek Sümeyye, Doğan Cemile Elvin, Yiğit Sevil, Mazı Emrah Erkan, Kaya Emine, Şengün Ahmet, Okur Hasan Caner, Terziođlu Nevin, Aktürk Müjde Yeşim, Şahin İbrahim, Acar Bilal, Atay Ahmet Engin, Yılmaz Ozan, İhsan Habibođlu, Demirtunç Refik, Çetin Nezhil Abdullah, Bambul Nail, Cengiz Mahir, Karakaş Mustafa Serkan, Özdemir Zeynep Tuğba, Kayıkçıođlu Sezgi.

**Ukraine:** Olga Garkavenko, Lilia Kisilevych, Vadym Romanov, Olena Matova, Mariia Egorova, Inna Kovaleva, Evgen Andreev, Oleksandr Galetsky, Iryna Chulaevska, Iryna Sichkaruk, Olena Chirva, Pavlo Kaplan, Oleg Leshchuk, Olga Verbovska, Olena Karlinska, Ivanna Antoniuk-Scheglova, Hanna Havalko, Viktoria Potaskalova, Olena Karmazina, Oksana Onoprienko, Tetiana Ostashevskva, Liudmyla Petrenko, Viktoria Bugeruk, Iryna Zaplatynska, Liudmyla Mazurok.



**Supplementary Table 3. Demographics, presenting characteristics and medical history at enrolment, for included and excluded (because of missing HbA1c measurement) patients**

|                                                                | Included ( <i>n</i> = 2377) | Excluded ( <i>n</i> = 1502) |
|----------------------------------------------------------------|-----------------------------|-----------------------------|
| <b>Demographics</b>                                            |                             |                             |
| Mean age, years (SD)                                           | 61.4 (10.4)                 | 61.9 (10.5)                 |
| Men                                                            | 1219 (51.3%)                | 825 (54.9%)                 |
| Educational level                                              |                             |                             |
| Illiterate                                                     | 169/2372 (7.1%)             | 83/1501 (5.5%)              |
| Primary                                                        | 649/2372 (27.4%)            | 379/1501 (25.2%)            |
| Secondary                                                      | 869/2372 (36.6%)            | 513/1501 (34.2%)            |
| University/higher                                              | 685/2372 (28.9%)            | 526/1501 (35.0%)            |
| Private health insurance                                       |                             |                             |
| Yes                                                            | 514 (21.6%)                 | 212 (14.1%)                 |
| No                                                             | 1724 (72.5%)                | 1131 (75.3%)                |
| Unknown                                                        | 139 (5.8%)                  | 159 (10.6%)                 |
| Insurance (public or private) that includes drug reimbursement | 1290/1815 (71.1%)           | 544/822 (66.2%)             |
| <b>Presenting characteristics</b>                              |                             |                             |
| Mean BMI, kg/m <sup>2</sup> (SD)*                              | 29.4 (5.5)                  | 29.1 (5.6)                  |
| BMI groups, kg/m <sup>2</sup>                                  |                             |                             |
| <25                                                            | 474/2339 (20.3%)            | 327/1488 (22.0%)            |
| 25 to <30                                                      | 921/2339 (39.4%)            | 598/1488 (40.2%)            |
| ≥30                                                            | 944/2339 (40.4%)            | 563/1488 (37.8%)            |
| Smoker                                                         |                             |                             |
| Current*                                                       | 285 (12.0%)                 | 133 (8.9%)                  |
| Former                                                         | 599 (25.2%)                 | 314 (20.9%)                 |
| Never                                                          | 1493 (62.8%)                | 1055 (70.2%)                |
| <b>Medical history</b>                                         |                             |                             |

|                                                                             |                   |                   |
|-----------------------------------------------------------------------------|-------------------|-------------------|
| Dyslipidaemia (diagnosis or history of; physician-defined)                  | 2138/2373 (90.1%) | 1325/1498 (88.5%) |
| Hypertension (diagnosis or history of; physician-defined)                   | 2242 (94.3%)      | 1402 (93.3%)      |
| Type of diabetes                                                            |                   |                   |
| 1                                                                           | 34 (1.4%)         | 25 (1.7%)         |
| 2                                                                           | 2302 (96.9%)      | 1414 (94.1%)      |
| Unknown                                                                     | 40 (1.7%)         | 63 (4.2%)         |
| Duration of diabetes, years (SD)                                            | 10.6 (7.7)        | 9.7 (7.9)         |
| Metabolic syndrome <sup>†</sup>                                             | 1605/2367 (67.8%) | 879/1482 (59.3%)  |
| CAD (documented)                                                            | 797 (33.5%)       | 544 (36.2%)       |
| Level of cardiovascular risk                                                |                   |                   |
| Level of cardiovascular risk evaluated according to 2016 ESC/EAS guidelines |                   |                   |
| High                                                                        | 907 (38.2%)       | 693 (46.1%)       |
| Very high                                                                   | 1470 (61.8%)      | 809 (53.9%)       |
| Investigator's assessment of cardiovascular risk                            |                   |                   |
| Low                                                                         | 240 (10.1%)       | 212 (14.1%)       |
| Moderate                                                                    | 487 (20.5%)       | 425 (28.3%)       |
| High                                                                        | 894 (37.6%)       | 379 (25.2%)       |
| Very high                                                                   | 752 (31.6%)       | 478 (31.8%)       |
| Unknown                                                                     | 4 (0.2%)          | 8 (0.5%)          |
| Risk factors controlled                                                     |                   |                   |
| LDL-C target achieved                                                       | 1044 (43.9%)      | 634 (42.2%)       |
| SBP <140 mmHg and DBP <90 mmHg                                              | 1320 (55.5%)      | 758 (50.5%)       |
| HbA1c <7%                                                                   | 935 (39.3%)       | NA                |

Data are n (%) or n/n (%), unless otherwise specified. \*Individuals who smoked any tobacco in the previous 12 months or who quit during past year. <sup>†</sup>Defined according to Adult Treatment Panel III. SD, standard deviation; BMI, body mass index; CAD, coronary artery disease; ESC, European Society of Cardiology; EAS, European Atherosclerosis Society; LDL-C, low-density lipoprotein cholesterol; SBP, systolic blood pressure; DBP, diastolic blood pressure; HbA1c, glycated haemoglobin; NA, not available.

**Supplementary Table 4. Demographics, presenting characteristics and medical history at enrolment, overall and by number of physician-modifiable risk factors controlled.**

|                                                                | Number of risk factors controlled |                         |                         |                           | Total (n = 2377)  |
|----------------------------------------------------------------|-----------------------------------|-------------------------|-------------------------|---------------------------|-------------------|
|                                                                | None<br>(n = 420; 17.7%)          | One<br>(n = 904; 38.0%) | Two<br>(n = 764; 32.1%) | Three<br>(n = 289; 12.2%) |                   |
| <b>Demographics</b>                                            |                                   |                         |                         |                           |                   |
| Mean age, years (SD)                                           | 59.3 (10.3)                       | 61.5 (10.6)             | 62.0 (10.0)             | 62.4 (10.4)               | 61.4 (10.4)       |
| Men                                                            | 197 (46.9%)                       | 482 (53.3%)             | 388 (50.8%)             | 152 (52.6%)               | 1219 (51.3%)      |
| Educational level                                              |                                   |                         |                         |                           |                   |
| Illiterate                                                     | 33/419 (7.9%)                     | 66/902 (7.3%)           | 50/763 (6.6%)           | 20/288 (6.9%)             | 169/2372 (7.1%)   |
| Primary                                                        | 127/419 (30.3%)                   | 253/902 (28.0%)         | 209/763 (27.4%)         | 60/288 (20.8%)            | 649/2372 (27.4%)  |
| Secondary                                                      | 136/419 (32.5%)                   | 335/902 (37.1%)         | 287/763 (37.6%)         | 111/288 (38.5%)           | 869/2372 (36.6%)  |
| University/higher                                              | 123/419 (29.4%)                   | 248/902 (27.5%)         | 217/763 (28.4%)         | 97/288 (33.7%)            | 685/2372 (28.9%)  |
| Private health insurance                                       |                                   |                         |                         |                           |                   |
| Yes                                                            | 72 (17.1%)                        | 169 (18.7%)             | 195 (25.5%)             | 78 (27.0%)                | 514 (21.6%)       |
| No                                                             | 329 (78.3%)                       | 686 (75.9%)             | 523 (68.5%)             | 186 (64.4%)               | 1724 (72.5%)      |
| Unknown                                                        | 19 (4.5%)                         | 49 (5.4%)               | 46 (6.0%)               | 25 (8.7%)                 | 139 (5.8%)        |
| Insurance (public or private) that includes drug reimbursement | 218/313 (69.6%)                   | 482/673 (71.6%)         | 439/609 (72.1%)         | 151/220 (68.6%)           | 1290/1815 (71.1%) |

**Presenting characteristics**

|                                                            |                 |                 |                 |                 |                   |
|------------------------------------------------------------|-----------------|-----------------|-----------------|-----------------|-------------------|
| Mean BMI, kg/m <sup>2</sup> (SD)*                          | 30.6 (6.3)      | 29.4 (5.4)      | 29.1 (5.2)      | 28.5 (5.1)      | 29.4 (5.5)        |
| BMI groups, kg/m <sup>2</sup>                              |                 |                 |                 |                 |                   |
| <25                                                        | 54/415 (13.0%)  | 197/890 (22.1%) | 158/750 (21.1%) | 65/284 (22.9%)  | 474/2339 (20.3%)  |
| 25 to <30                                                  | 156/415 (37.6%) | 327/890 (36.7%) | 305/750 (40.7%) | 133/284 (46.8%) | 921/2339 (39.4%)  |
| ≥30                                                        | 205/415 (49.4%) | 366/890 (41.1%) | 287/750 (38.3%) | 86/284 (30.3%)  | 944/2339 (40.4%)  |
| Smoker                                                     |                 |                 |                 |                 |                   |
| Current <sup>†</sup>                                       | 43 (10.2%)      | 137 (15.2%)     | 82 (10.7%)      | 23 (8.0%)       | 285 (12.0%)       |
| Former                                                     | 89 (21.2%)      | 223 (24.7%)     | 210 (27.5%)     | 77 (26.6%)      | 599 (25.2%)       |
| Never                                                      | 288 (68.6%)     | 544 (60.2%)     | 472 (61.8%)     | 189 (65.4%)     | 1493 (62.8%)      |
| <b>Medical history</b>                                     |                 |                 |                 |                 |                   |
| Dyslipidaemia (diagnosis or history of; physician-defined) | 381/419 (90.9%) | 814/903 (90.1%) | 682/763 (89.4%) | 261/288 (90.6%) | 2138/2373 (90.1%) |
| Hypertension (diagnosis or history of; physician-defined)  | 374 (89.0%)     | 844 (93.4%)     | 735 (96.2%)     | 289 (100.0%)    | 2242 (94.3%)      |
| Type of diabetes                                           |                 |                 |                 |                 |                   |
| 1                                                          | 8 (1.9%)        | 15 (1.7%)       | 10 (1.3%)       | 1 (0.3%)        | 34 (1.4%)         |
| 2                                                          | 407 (96.9%)     | 878 (97.1%)     | 733 (96.1%)     | 284 (98.3%)     | 2302 (96.9%)      |
| Unknown                                                    | 5 (1.2%)        | 11 (1.2%)       | 20 (2.6%)       | 4 (1.4%)        | 40 (1.7%)         |
| Duration of diabetes, years (SD) <sup>‡</sup>              | 11.7 (7.4)      | 11.7 (8.1)      | 9.4 (7.1)       | 8.7 (7.4)       | 10.6 (7.7)        |

|                                                                             |                 |                 |                 |                 |                   |
|-----------------------------------------------------------------------------|-----------------|-----------------|-----------------|-----------------|-------------------|
| Metabolic syndrome <sup>§</sup>                                             | 323/417 (77.5%) | 628/901 (69.7%) | 496/762 (65.1%) | 158/287 (55.1%) | 1605/2367 (67.8%) |
| CAD (documented)                                                            | 152 (36.2%)     | 313 (34.6%)     | 251 (32.9%)     | 81 (28.0%)      | 797 (33.5%)       |
| Atherosclerotic disease <sup>¶</sup>                                        | 181 (43.1%)     | 372 (41.2%)     | 293 (38.4%)     | 96 (33.2%)      | 942 (39.6%)       |
| Level of cardiovascular risk                                                |                 |                 |                 |                 |                   |
| Level of cardiovascular risk evaluated according to 2016 ESC/EAS guidelines |                 |                 |                 |                 |                   |
| High                                                                        | 117 (27.9%)     | 285 (31.5%)     | 349 (45.7%)     | 156 (54.0%)     | 907 (38.2%)       |
| Very high                                                                   | 303 (72.1%)     | 619 (68.5%)     | 415 (54.3%)     | 133 (46.0%)     | 1470 (61.8%)      |
| Investigator's assessment of cardiovascular risk                            |                 |                 |                 |                 |                   |
| Low                                                                         | 34 (8.1%)       | 91 (10.1%)      | 80 (10.5%)      | 35 (12.1%)      | 240 (10.1%)       |
| Moderate                                                                    | 77 (18.3%)      | 186 (20.6%)     | 158 (20.7%)     | 66 (22.8%)      | 487 (20.5%)       |
| High                                                                        | 164 (39.0%)     | 323 (35.7%)     | 309 (40.4%)     | 98 (33.9%)      | 894 (37.6%)       |
| Very high                                                                   | 144 (34.3%)     | 301 (33.3%)     | 217 (28.4%)     | 90 (31.1%)      | 752 (31.6%)       |
| Unknown                                                                     | 1 (0.2%)        | 3 (0.3%)        | 0 (0.0%)        | 0 (0.0%)        | 4 (0.2%)          |
| Risk factors controlled                                                     |                 |                 |                 |                 |                   |
| LDL-C target achieved                                                       | 0 (0.0%)        | 253 (28.0%)     | 502 (65.7%)     | 289 (100.0%)    | 1044 (43.9%)      |
| SBP <140 mmHg and DBP <90 mmHg                                              | 0 (0.0%)        | 447 (49.4%)     | 584 (76.4%)     | 289 (100.0%)    | 1320 (55.5%)      |
| HbA1c <7%                                                                   | 0 (0.0%)        | 204 (22.6%)     | 442 (57.9%)     | 289 (100.0%)    | 935 (39.3%)       |

Data are n (%) or n/n (%), unless otherwise specified. \*n = 415, 890, 750, 284, and 2339 for none, one, two, three and total groups, respectively. †Individuals who smoked any tobacco in the previous 12 months or who quit during past year. ‡n = 409, 856, 718, 268, and 2251 for none, one, two, three and total groups, respectively. §Defined according

to Adult Treatment Panel III. <sup>†</sup>CAD, stroke, or peripheral artery disease. SD, standard deviation; BMI, body mass index; CAD, coronary artery disease; ESC, European Society of Cardiology; EAS, European Atherosclerosis Society; LDL-C, low-density lipoprotein cholesterol; SBP, systolic blood pressure; DBP, diastolic blood pressure; HbA1c, glycated haemoglobin.

**Supplementary Table 5. Demographics, presenting characteristics and medical history at enrolment, overall and by number of health-system related risk factors controlled in patients with obesity.**

|                                                                | Number of risk factors controlled |                       |                       |                        | Total ( <i>n</i> = 944) |
|----------------------------------------------------------------|-----------------------------------|-----------------------|-----------------------|------------------------|-------------------------|
|                                                                | None ( <i>n</i> = 205)            | One ( <i>n</i> = 366) | Two ( <i>n</i> = 287) | Three ( <i>n</i> = 86) |                         |
| <b>Demographics</b>                                            |                                   |                       |                       |                        |                         |
| Mean age, years (SD)                                           | 59.6 (9.9)                        | 60.2 (9.7)            | 61.4 (9.5)            | 60.5 (9.8)             | 60.5 (9.7)              |
| Men                                                            | 77 (37.6%)                        | 175 (47.8%)           | 116 (40.4%)           | 42 (48.8%)             | 410 (43.4%)             |
| Educational level                                              |                                   |                       |                       |                        |                         |
| Illiterate                                                     | 15 (7.3%)                         | 31/364 (8.5%)         | 24/286 (8.4%)         | 8 (9.3%)               | 78/941 (8.3%)           |
| Primary                                                        | 75 (36.6%)                        | 104/364 (28.6%)       | 92/286 (32.2%)        | 23 (26.7%)             | 294/941 (31.2%)         |
| Secondary                                                      | 66 (32.2%)                        | 133/364 (36.5%)       | 99/286 (34.6%)        | 23 (26.7%)             | 321/941 (34.1%)         |
| University/higher                                              | 49 (23.9%)                        | 96/364 (26.4%)        | 71/286 (24.8%)        | 32 (37.2%)             | 248/941 (26.4%)         |
| Private health insurance                                       |                                   |                       |                       |                        |                         |
| Yes                                                            | 30 (14.6%)                        | 77 (21.0%)            | 66 (23.0%)            | 24 (27.9%)             | 197 (20.9%)             |
| No                                                             | 168 (82.0%)                       | 274 (74.9%)           | 206 (71.8%)           | 53 (61.6%)             | 701 (74.3%)             |
| Unknown                                                        | 7 (3.4%)                          | 15 (4.1%)             | 15 (5.2%)             | 9 (10.5%)              | 46 (4.9%)               |
| Insurance (public or private) that includes drug reimbursement | 122 (74.8%)                       | 214 (70.2%)           | 172 (71.4%)           | 41 (64.1%)             | 549 (71.0%)             |

**Presenting characteristics**

|                                  |             |             |             |            |             |
|----------------------------------|-------------|-------------|-------------|------------|-------------|
| Mean BMI, kg/m <sup>2</sup> (SD) | 34.8 (6.3)  | 34.7 (4.0)  | 34.2 (4.2)  | 34.4 (4.4) | 34.5 (4.6)  |
| Smoker                           |             |             |             |            |             |
| Current*                         | 20 (9.8%)   | 48 (13.1%)  | 26 (9.1%)   | 2 (2.3%)   | 96 (10.2%)  |
| Former                           | 39 (19.0%)  | 85 (23.2%)  | 74 (25.8%)  | 24 (27.9%) | 222 (23.5%) |
| Never                            | 146 (71.2%) | 233 (63.7%) | 187 (65.2%) | 60 (69.8%) | 626 (66.3%) |

**Medical history**

|                                                            |                 |                 |                 |               |                 |
|------------------------------------------------------------|-----------------|-----------------|-----------------|---------------|-----------------|
| Dyslipidaemia (diagnosis or history of; physician defined) | 185 (90.2%)     | 340/365 (93.2%) | 263 (91.6%)     | 77 (89.5%)    | 865/943 (91.7%) |
| Hypertension (diagnosis or history of; physician defined)  | 189 (92.2%)     | 349 (95.4%)     | 278 (96.9%)     | 86 (100.0%)   | 902 (95.6%)     |
| Type of diabetes                                           |                 |                 |                 |               |                 |
| 1                                                          | 4 (2.0%)        | 5 (1.4%)        | 5 (1.7%)        | 0 (0.0%)      | 14 (1.5%)       |
| 2                                                          | 201 (98.0%)     | 359 (98.1%)     | 273 (95.1%)     | 85 (98.8%)    | 918 (97.2%)     |
| Unknown                                                    | 0 (0.0%)        | 2 (0.5%)        | 9 (3.1%)        | 1 (1.2%)      | 12 (1.3%)       |
| Duration of diabetes, years (SD) <sup>†</sup>              | 11.5 (7.3)      | 11.6 (7.7)      | 9.0 (7.3)       | 8.9 (6.9)     | 10.5 (7.5)      |
| Metabolic syndrome <sup>‡</sup>                            | 174/204 (85.3%) | 302 (82.5%)     | 224/286 (78.3%) | 59/85 (69.4%) | 759/941 (80.7%) |
| CAD (documented)                                           | 73 (35.6%)      | 132 (36.1%)     | 90 (31.4%)      | 18 (20.9%)    | 313 (33.2%)     |
| Level of cardiovascular risk                               |                 |                 |                 |               |                 |



Level of cardiovascular risk evaluated according to 2016 ESC/EAS guidelines

|           |             |             |             |            |             |
|-----------|-------------|-------------|-------------|------------|-------------|
| High      | 61 (29.8%)  | 113 (30.9%) | 139 (48.4%) | 54 (62.8%) | 367 (38.9%) |
| Very high | 144 (70.2%) | 253 (69.1%) | 148 (51.6%) | 32 (37.2%) | 577 (61.1%) |

Investigator's assessment of cardiovascular risk

|           |            |             |             |            |             |
|-----------|------------|-------------|-------------|------------|-------------|
| Low       | 13 (6.3%)  | 25 (6.8%)   | 25 (8.7%)   | 9 (10.5%)  | 72 (7.6%)   |
| Moderate  | 36 (17.6%) | 66 (18.0%)  | 55 (19.2%)  | 23 (26.7%) | 180 (19.1%) |
| High      | 76 (37.1%) | 128 (35.0%) | 113 (39.4%) | 26 (30.2%) | 343 (36.3%) |
| Very high | 80 (39.0%) | 146 (39.9%) | 94 (32.8%)  | 28 (32.6%) | 348 (36.9%) |
| Unknown   | 0 (0.0%)   | 1 (0.3%)    | 0 (0.0%)    | 0 (0.0%)   | 1 (0.1%)    |

Risk factors controlled

|                                |          |             |             |             |             |
|--------------------------------|----------|-------------|-------------|-------------|-------------|
| LDL-C target achieved          | 0 (0.0%) | 107 (29.2%) | 189 (65.9%) | 86 (100.0%) | 382 (40.5%) |
| SBP <140 mmHg and DBP <90 mmHg | 0 (0.0%) | 175 (47.8%) | 217 (75.6%) | 86 (100.0%) | 478 (50.6%) |
| HbA1c <7%                      | 0 (0.0%) | 84 (23.0%)  | 168 (58.5%) | 86 (100.0%) | 338 (35.8%) |

Data are n (%) or n/n (%), unless otherwise specified. \*n = 200, 352, 275, 83, and 910 for none, one, two, three, and total groups, respectively. †Individuals who smoked any tobacco in the previous 12 months or who quit during past year. ‡Defined according to Adult Treatment Panel III. SD, standard deviation; BMI, body mass index; CAD, coronary artery disease; ESC, European Society of Cardiology; EAS, European Atherosclerosis Society; LDL-C, low-density lipoprotein cholesterol; SBP, systolic blood pressure; DBP, diastolic blood pressure; HbA1c, glycated haemoglobin.

**Supplementary Table 6. Lipid-modifying, antidiabetic and antihypertensive therapies at enrolment, overall and by number of health-system related risk factors controlled in patients with obesity**

|                                                        | Number of risk factors controlled |                       |                       |                        | Total ( <i>n</i> = 944) |
|--------------------------------------------------------|-----------------------------------|-----------------------|-----------------------|------------------------|-------------------------|
|                                                        | None ( <i>n</i> = 205)            | One ( <i>n</i> = 366) | Two ( <i>n</i> = 287) | Three ( <i>n</i> = 86) |                         |
| <b>LMT</b>                                             |                                   |                       |                       |                        |                         |
| Any statin                                             | 200 (97.6%)                       | 360 (98.4%)           | 281 (97.9%)           | 84 (97.7%)             | 925 (98.0%)             |
| High-intensity statin (in statin-treated patients)     | 69/200 (34.5%)                    | 100/360 (27.8%)       | 74/281 (26.3%)        | 17/84 (20.2%)          | 260/925 (28.1%)         |
| On highest dose of statin (in statin-treated patients) | 55/200 (27.5%)                    | 94/360 (26.1%)        | 75/281 (26.7%)        | 18/84 (21.4%)          | 242/925 (26.2%)         |
| Statin monotherapy                                     | 169 (82.4%)                       | 307 (83.9%)           | 254 (88.5%)           | 71 (82.6%)             | 801 (84.9%)             |
| Statin+fibrate±other LMT                               | 23 (11.2%)                        | 38 (10.4%)            | 17 (5.9%)             | 8 (9.3%)               | 86 (9.1%)               |
| Statin+cholesterol absorption inhibitor±other LMT      | 3 (1.5%)                          | 9 (2.5%)              | 7 (2.4%)              | 3 (3.5%)               | 22 (2.3%)               |
| <b>Antihypertensive therapies</b>                      |                                   |                       |                       |                        |                         |
| Any antihypertensive therapy                           |                                   |                       |                       |                        |                         |
| Yes                                                    | 191 (93.2%)                       | 342 (93.4%)           | 265 (92.3%)           | 84 (97.7%)             | 882 (93.4%)             |
| No                                                     | 13 (6.3%)                         | 22 (6.0%)             | 16 (5.6%)             | 2 (2.3%)               | 53 (5.6%)               |
| Unknown                                                | 1 (0.5%)                          | 2 (0.5%)              | 6 (2.1%)              | 0 (0.0%)               | 9 (1.0%)                |
| ACEI                                                   | 78 (38.0%)                        | 122 (33.3%)           | 77 (26.8%)            | 14 (16.3%)             | 291 (30.8%)             |
| ARB                                                    | 97 (47.3%)                        | 175 (47.8%)           | 158 (55.1%)           | 65 (75.6%)             | 495 (52.4%)             |

|                                          |             |             |                 |             |                 |
|------------------------------------------|-------------|-------------|-----------------|-------------|-----------------|
| Diuretic                                 | 87 (42.4%)  | 136 (37.2%) | 100 (34.8%)     | 43 (50.0%)  | 366 (38.8%)     |
| Beta-blocker                             | 79 (38.5%)  | 150 (41.0%) | 123 (42.9%)     | 35 (40.7%)  | 387 (41.0%)     |
| Calcium-channel blocker                  | 79 (38.5%)  | 130 (35.5%) | 82 (28.6%)      | 35 (40.7%)  | 326 (34.5%)     |
| Other antihypertensive                   | 11 (5.4%)   | 31 (8.5%)   | 17 (5.9%)       | 1 (1.2%)    | 60 (6.4%)       |
| Any antihypertensive combination therapy | 140 (68.3%) | 245 (66.9%) | 189 (65.9%)     | 63 (73.3%)  | 637 (67.5%)     |
| ACEI±other antihypertensive therapy      | 56 (27.3%)  | 91 (24.9%)  | 58 (20.2%)      | 11 (12.8%)  | 217 (23.0%)     |
| ARB±other antihypertensive therapy       | 77 (37.6%)  | 140 (38.3%) | 126 (43.9%)     | 50 (58.1%)  | 393 (41.6%)     |
| ACEI+ARB±other antihypertensive therapy  | 4 (2.0%)    | 7 (1.9%)    | 0 (0.0%)        | 1 (1.2%)    | 12 (1.3%)       |
| <b>Antidiabetic therapies</b>            |             |             |                 |             |                 |
| Any antidiabetic therapy                 | 204 (99.5%) | 364 (99.5%) | 276 (96.2%)     | 86 (100.0%) | 930 (98.5%)     |
| Insulin                                  |             |             |                 |             |                 |
| Yes                                      | 118 (57.6%) | 183 (50.0%) | 102/286 (35.7%) | 22 (25.6%)  | 425/943 (45.1%) |
| No                                       | 85 (41.5%)  | 175 (47.8%) | 176 (61.5%)     | 61 (70.9%)  | 497 (52.7%)     |
| Unknown                                  | 2 (1.0%)    | 8 (2.2%)    | 8 (2.8%)        | 3 (3.5%)    | 21 (2.2%)       |
| Oral antidiabetic                        |             |             |                 |             |                 |
| Yes                                      | 169 (82.4%) | 318 (86.9%) | 254 (88.5%)     | 85 (98.8%)  | 826 (87.5%)     |
| No                                       | 32 (15.6%)  | 45 (12.3%)  | 27 (9.4%)       | 1 (1.2%)    | 105 (11.1%)     |
| Unknown                                  | 4 (2.0%)    | 3 (0.8%)    | 6 (2.1%)        | 0 (0.0%)    | 13 (1.4%)       |

Data are n (%) or n/n (%). LMT, lipid-modifying therapy; ACEI, angiotensin-converting enzyme inhibitor; ARB, Angiotensin II receptor blocker.

**Supplementary Table 7. Demographics, presenting characteristics and medical history at enrolment, overall and by number of health-system related risk factors controlled in patients with atherosclerotic disease.\***

|                                                                | Number of risk factors controlled |                       |                       |                        | Total ( <i>n</i> = 942) |
|----------------------------------------------------------------|-----------------------------------|-----------------------|-----------------------|------------------------|-------------------------|
|                                                                | None ( <i>n</i> = 181)            | One ( <i>n</i> = 372) | Two ( <i>n</i> = 293) | Three ( <i>n</i> = 96) |                         |
| <b>Demographics</b>                                            |                                   |                       |                       |                        |                         |
| Mean age, years (SD)                                           | 61.5 (9.7)                        | 63.9 (10.1)           | 65.3 (9.1)            | 65.2 (9.5)             | 64.0 (9.7)              |
| Men                                                            | 104 (57.5%)                       | 245 (65.9%)           | 192 (65.5%)           | 69 (71.9%)             | 610 (64.8%)             |
| Educational level                                              |                                   |                       |                       |                        |                         |
| Illiterate                                                     | 19 (10.5%)                        | 33 (8.9%)             | 21 (7.2%)             | 3 (3.1%)               | 76 (8.1%)               |
| Primary                                                        | 41 (22.7%)                        | 108 (29.0%)           | 83 (28.3%)            | 20 (20.8%)             | 252 (26.8%)             |
| Secondary                                                      | 58 (32.0%)                        | 129 (34.7%)           | 106 (36.2%)           | 46 (47.9%)             | 339 (36.0%)             |
| University/higher                                              | 63 (34.8%)                        | 102 (27.4%)           | 83 (28.3%)            | 27 (28.1%)             | 275 (29.2%)             |
| Private health insurance                                       |                                   |                       |                       |                        |                         |
| Yes                                                            | 38 (21.0%)                        | 63 (16.9%)            | 72 (24.6%)            | 23 (24.0%)             | 196 (20.8%)             |
| No                                                             | 137 (75.7%)                       | 294 (79.0%)           | 213 (72.7%)           | 67 (69.8%)             | 711 (75.5%)             |
| Unknown                                                        | 6 (3.3%)                          | 15 (4.0%)             | 8 (2.7%)              | 6 (6.3%)               | 35 (3.7%)               |
| Insurance (public or private) that includes drug reimbursement | 97/141 (68.8%)                    | 202/297 (68.0%)       | 192/254 (75.6%)       | 56/76 (73.7%)          | 547/768 (71.2%)         |

**Presenting characteristics**

|                                                            |                 |                 |                 |               |                 |
|------------------------------------------------------------|-----------------|-----------------|-----------------|---------------|-----------------|
| Mean BMI, kg/m <sup>2</sup> (SD) <sup>†</sup>              | 30.2 (5.2)      | 29.5 (5.4)      | 28.5 (4.6)      | 27.6 (4.7)    | 29.1 (5.1)      |
| BMI groups, kg/m <sup>2</sup>                              |                 |                 |                 |               |                 |
| <25                                                        | 25/179 (14.0%)  | 78/365 (21.4%)  | 65/287 (22.6%)  | 24/94 (25.5%) | 192/925 (20.8%) |
| 25 to <30                                                  | 67/179 (37.4%)  | 133/365 (36.4%) | 120/287 (41.8%) | 50/94 (53.2%) | 370/925 (40.0%) |
| ≥30                                                        | 87/179 (48.6%)  | 154/365 (42.2%) | 102/287 (35.5%) | 20/94 (21.3%) | 363/925 (39.2%) |
| Smoker                                                     |                 |                 |                 |               |                 |
| Current <sup>‡</sup>                                       | 20 (11.0%)      | 63 (16.9%)      | 39 (13.3%)      | 12 (12.5%)    | 134 (14.2%)     |
| Former                                                     | 52 (28.7%)      | 128 (34.4%)     | 118 (40.3%)     | 44 (45.8%)    | 342 (36.3%)     |
| Never                                                      | 109 (60.2%)     | 181 (48.7%)     | 136 (46.4%)     | 40 (41.7%)    | 466 (49.5%)     |
| <b>Medical history</b>                                     |                 |                 |                 |               |                 |
| Dyslipidaemia (diagnosis or history of; physician-defined) | 159/180 (88.3%) | 326/371 (87.9%) | 245/293 (83.6%) | 82/95 (86.3%) | 812/939 (86.5%) |
| Hypertension (diagnosis or history of; physician-defined)  | 171 (94.5%)     | 361 (97.0%)     | 287 (98.0%)     | 96 (100.0%)   | 915 (97.1%)     |
| Type of diabetes                                           |                 |                 |                 |               |                 |
| 1                                                          | 7 (3.9%)        | 6 (1.6%)        | 3/292 (1.0%)    | 0 (0.0%)      | 16/941 (1.7%)   |
| 2                                                          | 173 (95.6%)     | 357 (96.0%)     | 285/292 (97.6%) | 95 (99.0%)    | 910/941 (96.7%) |
| Unknown                                                    | 1 (0.6%)        | 9 (2.4%)        | 4/292 (1.4%)    | 1 (1.0%)      | 15/941 (1.6%)   |
| Duration of diabetes, years (SD) <sup>§</sup>              | 12.9 (7.9)      | 12.7 (8.9)      | 10.2 (7.4)      | 8.2 (7.8)     | 11.5 (8.3)      |

|                                                  |                 |                 |                 |               |                 |
|--------------------------------------------------|-----------------|-----------------|-----------------|---------------|-----------------|
| Metabolic syndrome <sup>¶</sup>                  | 145/180 (80.6%) | 277/372 (74.5%) | 192/293 (65.5%) | 58/96 (60.4%) | 672/941 (71.4%) |
| CAD (documented)                                 | 152 (84.0%)     | 313 (84.1%)     | 251 (85.7%)     | 81 (84.4%)    | 797 (84.6%)     |
| Level of cardiovascular risk                     |                 |                 |                 |               |                 |
| Investigator's assessment of cardiovascular risk |                 |                 |                 |               |                 |
| Low                                              | 6 (3.3%)        | 8 (2.2%)        | 6 (2.0%)        | 3 (3.1%)      | 23 (2.4%)       |
| Moderate                                         | 25 (13.8%)      | 40 (10.8%)      | 36 (12.3%)      | 12 (12.5%)    | 113 (12.0%)     |
| High                                             | 56 (30.9%)      | 119 (32.0%)     | 93 (31.7%)      | 23 (24.0%)    | 291 (30.9%)     |
| Very high                                        | 94 (51.9%)      | 205 (55.1%)     | 158 (53.9%)     | 58 (60.4%)    | 515 (54.7%)     |
| Risk factors controlled                          |                 |                 |                 |               |                 |
| LDL-C target achieved                            | 0 (0.0%)        | 89 (23.9%)      | 175 (59.7%)     | 96 (100.0%)   | 360 (38.2%)     |
| SBP <140 mmHg and DBP < 90 mmHg                  | 0 (0.0%)        | 207 (55.6%)     | 229 (78.2%)     | 96 (100.0%)   | 532 (56.5%)     |
| HbA1c <7%                                        | 0 (0.0%)        | 76 (20.4%)      | 182 (62.1%)     | 96 (100.0%)   | 354 (37.6%)     |

Data are n (%) or n/n (%), unless otherwise specified. \*CAD, stroke or peripheral artery disease. †n = 179, 365, 287, 84, and 925 for none, one, two, three and total groups, respectively. ‡Individuals who smoked any tobacco in the previous 12 months or who quit during past year. §n = 177, 347, 275, 89, and 888 for none, one, two, three and total groups, respectively. ¶Defined according to Adult Treatment Panel III. SD, standard deviation; BMI, body mass index; CAD, coronary artery disease; LDL-C, low-density lipoprotein cholesterol; SBP, systolic blood pressure; DBP, diastolic blood pressure; HbA1c, glycated haemoglobin.

**Supplementary Table 8. Lipid-modifying, antidiabetic and antihypertensive therapies at enrolment, overall and by number of health-system-related risk factors controlled in patients with atherosclerotic disease\*.**

|                                                        | Number of risk factors controlled |                 |                |                | Total (n = 942) |
|--------------------------------------------------------|-----------------------------------|-----------------|----------------|----------------|-----------------|
|                                                        | None (n = 181)                    | One (n = 372)   | Two (n = 293)  | Three (n = 96) |                 |
| <b>LMT</b>                                             |                                   |                 |                |                |                 |
| Any statin                                             | 178 (98.3%)                       | 367 (98.7%)     | 291 (99.3%)    | 96 (100.0%)    | 932 (98.9%)     |
| High-intensity statin (in statin-treated patients)     | 67/178 (37.6%)                    | 132/367 (36.0%) | 99/291 (34.0%) | 35/96 (36.5%)  | 333/932 (35.7%) |
| On highest dose of statin (in statin-treated patients) | 61/178 (34.3%)                    | 117/367 (31.9%) | 92/291 (31.6%) | 25/96 (26.0%)  | 295/932 (31.7%) |
| Statin monotherapy                                     | 145 (80.1%)                       | 310 (83.3%)     | 254 (86.7%)    | 84 (87.5%)     | 793 (84.2%)     |
| Statin+fibrate±other LMT                               | 15 (8.3%)                         | 38 (10.2%)      | 23 (7.8%)      | 3 (3.1%)       | 79 (8.4%)       |
| Statin+cholesterol absorption inhibitor±other LMT      | 10 (5.5%)                         | 15 (4.0%)       | 4 (1.4%)       | 4 (4.2%)       | 33 (3.5%)       |
| <b>Antihypertensive therapies</b>                      |                                   |                 |                |                |                 |
| Any antihypertensive therapy                           |                                   |                 |                |                |                 |
| Yes                                                    | 176 (97.2%)                       | 365 (98.1%)     | 287 (98.0%)    | 94 (97.9%)     | 922 (97.9%)     |
| No                                                     | 2 (1.1%)                          | 4 (1.1%)        | 4 (1.4%)       | 2 (2.1%)       | 12 (1.3%)       |
| Unknown                                                | 3 (1.7%)                          | 3 (0.8%)        | 2 (0.7%)       | 0 (0.0%)       | 8 (0.8%)        |
| ACEI                                                   | 67 (37.0%)                        | 130 (34.9%)     | 89 (30.4%)     | 20 (20.8%)     | 306 (32.5%)     |
| ARB                                                    | 82 (45.3%)                        | 163 (43.8%)     | 143 (48.8%)    | 52 (54.2%)     | 440 (46.7%)     |

|                                          |              |             |                |            |                 |
|------------------------------------------|--------------|-------------|----------------|------------|-----------------|
| Diuretic                                 | 77 (42.5%)   | 139 (37.4%) | 101 (34.5%)    | 38 (39.6%) | 355 (37.7%)     |
| Beta-blocker                             | 110 (60.8%)  | 245 (65.9%) | 189 (64.5%)    | 63 (65.6%) | 607 (64.4%)     |
| Calcium-channel blocker                  | 68 (37.6%)   | 130 (34.9%) | 76 (25.9%)     | 28 (29.2%) | 302 (32.1%)     |
| Other antihypertensive                   | 16 (8.8%)    | 36 (9.7%)   | 21 (7.2%)      | 4 (4.2%)   | 77 (8.2%)       |
| Any antihypertensive combination therapy | 141 (77.9%)  | 281 (75.5%) | 212 (72.4%)    | 66 (68.8%) | 700 (74.3%)     |
| ACEI±other antihypertensive therapy      | 58 (32.0%)   | 112 (30.1%) | 80 (27.3%)     | 19 (19.8%) | 269 (28.6%)     |
| ARB±other antihypertensive therapy       | 74 (40.9%)   | 142 (38.2%) | 115 (39.2%)    | 40 (41.7%) | 371 (39.4%)     |
| ACEI+ARB±other antihypertensive therapy  | 2 (1.1%)     | 4 (1.1%)    | 1 (0.3%)       | 0 (0.0%)   | 7 (0.7%)        |
| <b>Antidiabetic therapies</b>            |              |             |                |            |                 |
| Any antidiabetic therapy                 | 181 (100.0%) | 367 (98.7%) | 289 (98.6%)    | 94 (97.9%) | 931 (98.8%)     |
| Insulin                                  |              |             |                |            |                 |
| Yes                                      | 95 (52.5%)   | 167 (44.9%) | 91/291 (31.3%) | 13 (13.5%) | 366/940 (38.9%) |
| No                                       | 85 (47.0%)   | 199 (53.5%) | 196 (67.4%)    | 80 (83.3%) | 560 (59.6%)     |
| Unknown                                  | 1 (0.6%)     | 6 (1.6%)    | 4 (1.4%)       | 3 (3.1%)   | 14 (1.5%)       |
| Oral antidiabetic                        |              |             |                |            |                 |
| Yes                                      | 153 (84.5%)  | 306 (82.3%) | 257 (87.7%)    | 90 (93.8%) | 806 (85.6%)     |
| No                                       | 24 (13.3%)   | 59 (15.9%)  | 30 (10.2%)     | 4 (4.2%)   | 117 (12.4%)     |
| Unknown                                  | 4 (2.2%)     | 7 (1.9%)    | 6 (2.0%)       | 2 (2.1%)   | 19 (2.0%)       |

Data are n (%) or n/n (%). \*CAD, stroke, or peripheral artery disease. LMT, lipid-modifying therapy; ACEI, angiotensin-converting enzyme inhibitor; ARB, angiotensin II receptor blocker.



Supplementary Figure 1. Annotated example of the output of a multiple correspondence analysis.<sup>2, 3</sup>

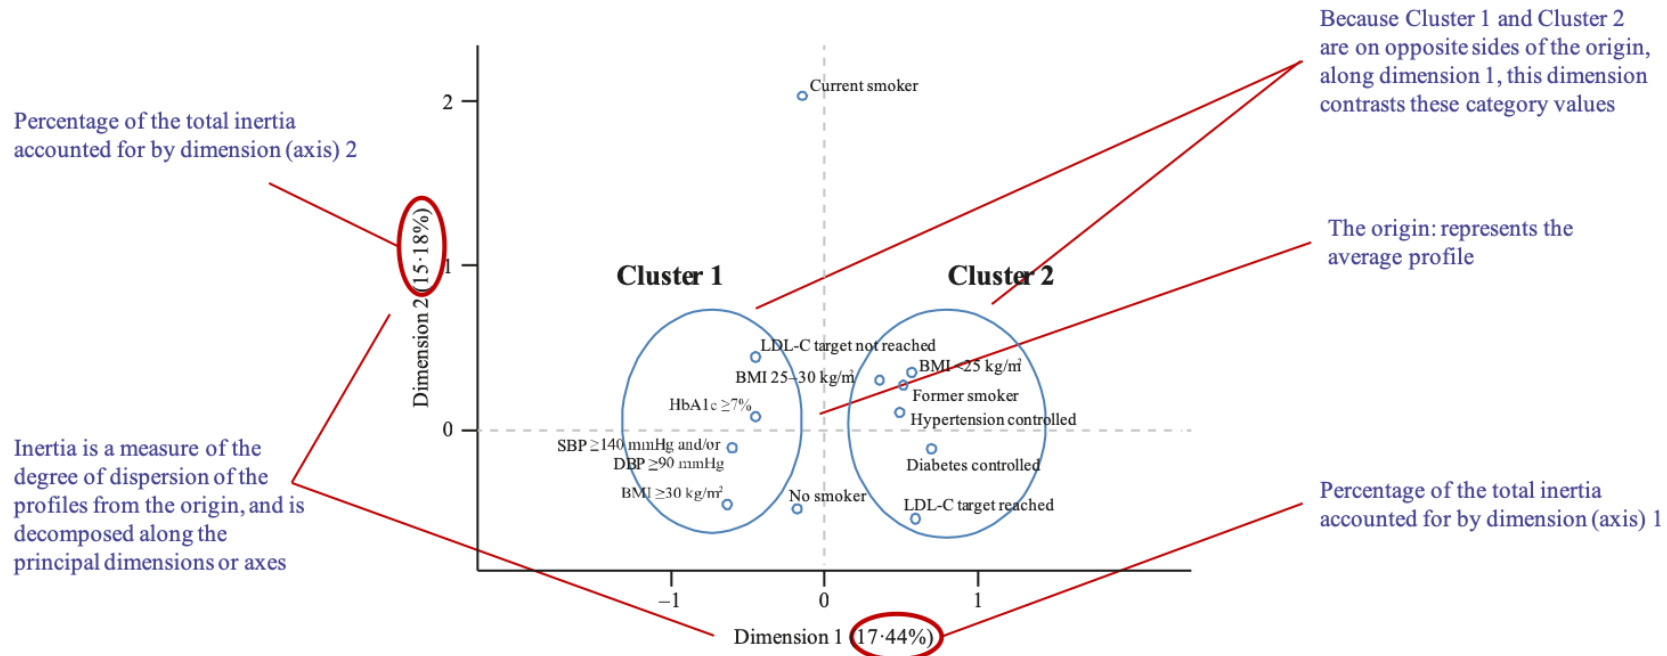

Multiple correspondence analysis (MCA) is based on the analysis of categorical data with a contingency table, which enables the assessment of interactions between the variables. MCA graphically represents the relationships between multiple categories that would be too complex to display in a contingency table. MCA locates all the categories (rows and columns of the contingency table) as profiles in a multidimensional space. The average profile is represented as a point at the origin. Inertia is a measure of the degree of dispersion of the profiles from the origin. Profiles that cluster together within the space represented by these dimensions are considered to be associated. BMI, body mass index; DBP, diastolic blood pressure; LDL-C, low-density lipoprotein cholesterol; HBA1c, glycated haemoglobin; SBP, systolic blood pressure.

## Supplementary Figure 2. Patient flow chart

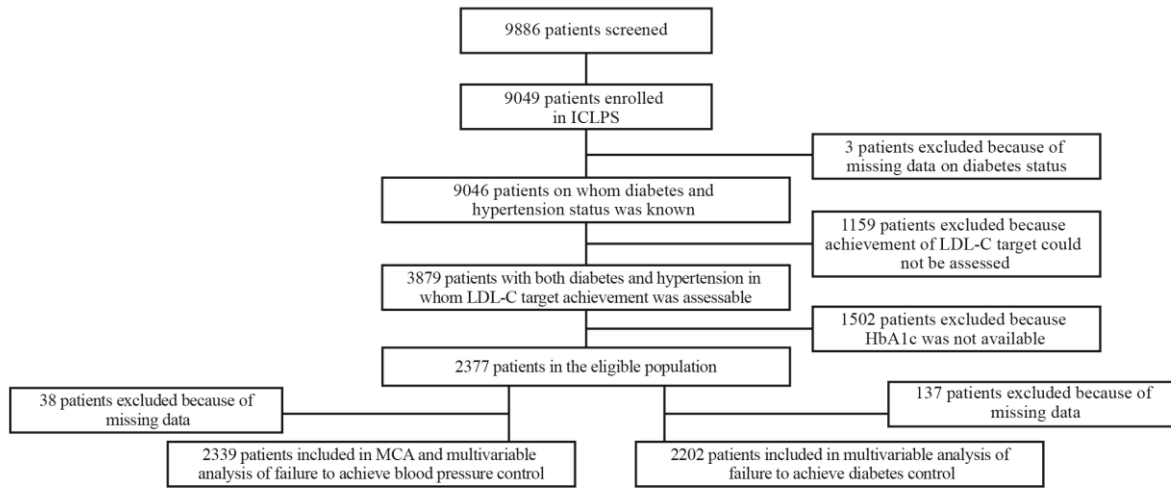

ICLPS, International ChoLesterol management Practice Study; LDL-C, low-density lipoprotein cholesterol; HbA1c, glycated haemoglobin; MCA, multiple correspondence analysis.

**Supplementary Figure 3: Proportion of ICLPS participants with both diabetes and hypertension a) with none, one, two and three risk factors controlled at enrolment, overall and by country**

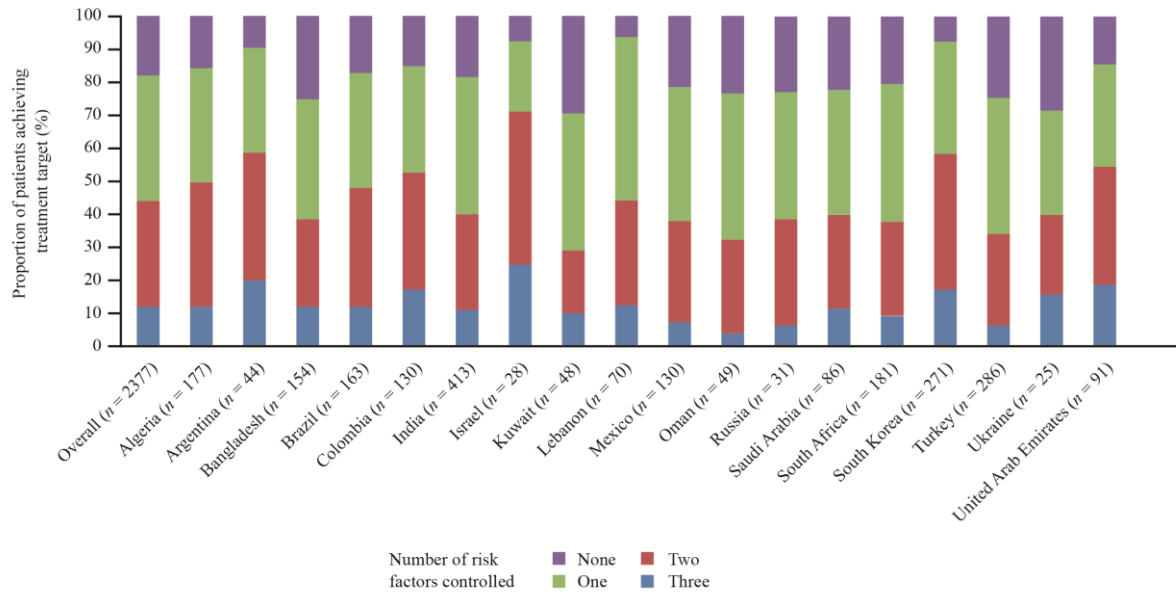

ICLPS, International ChoLesterol management Practice Study.

**Supplementary Figure 4. Patient factors independently associated with a) SBP  $\geq 140$  mmHg and/or DBP  $\geq 90$  mmHg ( $n = 2339$ ; C-statistic: 0.433 [0.409; 0.456])**

**b) HbA1c  $\geq 7\%$  ( $n = 2107$ ; C-statistic: 0.3295 [0.3057; 0.3532])**

a)

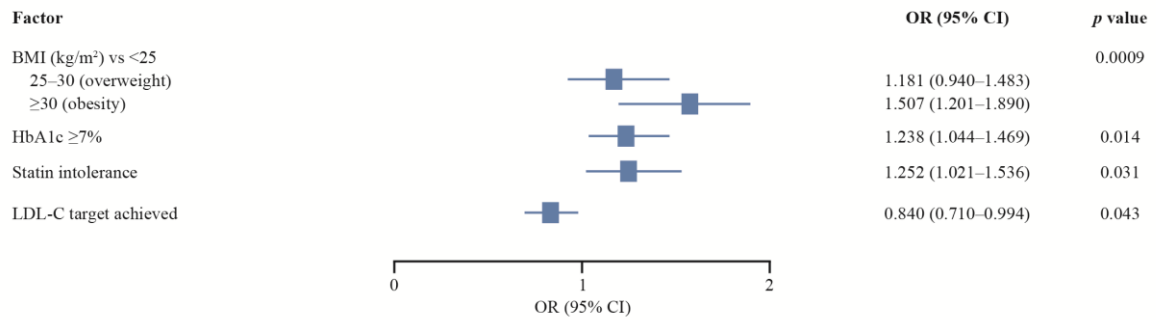

b)

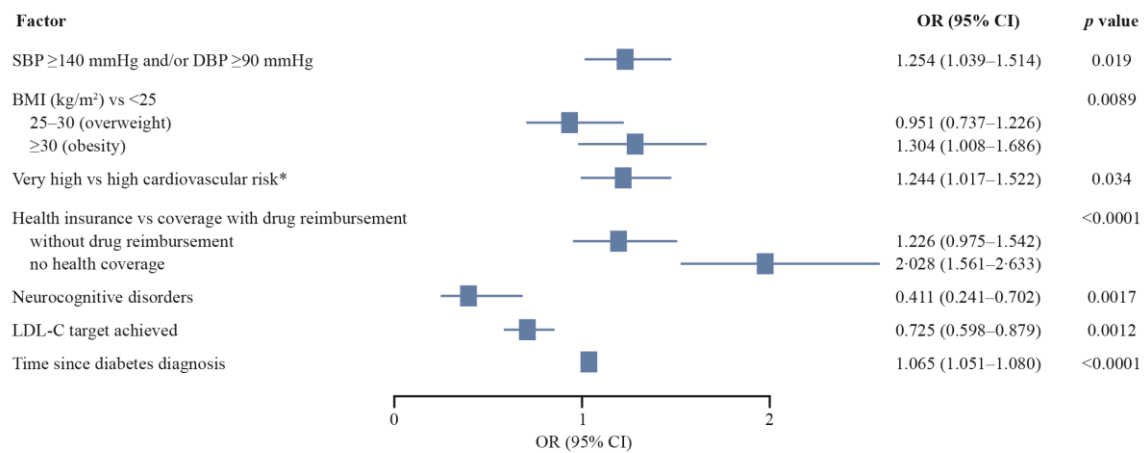

\*Assessed according to 2016 ESC/EAS guidelines. SBP, systolic blood pressure; DBP, diastolic blood pressure; HbA1c, glycated haemoglobin; OR, odds ratio; CI, confidence interval; LDL-C, low-density lipoprotein cholesterol.

## References

1. Perk J, De Backer G, Gohlke H, et al. European Guidelines on cardiovascular disease prevention in clinical practice (version 2012). The Fifth Joint Task Force of the European Society of Cardiology and Other Societies on Cardiovascular Disease Prevention in Clinical Practice (constituted by representatives of nine societies and by invited experts). Developed with the special contribution of the European Association for Cardiovascular Prevention & Rehabilitation (EACPR). *Eur Heart J* 2012; 33: 1635–1701.
2. Greenacre MJ. *Theory and Applications of Correspondence Analysis*. London: Academic Press, 1984.
3. Minitab Inc. Example of multiple correspondence analysis, <https://support.minitab.com/en-us/minitab/18/help-and-how-to/modeling-statistics/multivariate/how-to/multiple-correspondence-analysis/before-you-start/example/> (2017, accessed 5 February 2019).
